# Supplementary material
Source: PubMed Central journal article supplement (PMC1087945)
Supplement: pnas_102_17_6039__3.pdf [file pnas_102_17_6039__3.pdf]

**Table 4. OR genes in the pufferfish genome**

| No. | Gene name   | F or P * | Scaffold no. | Initial position | Terminal position | Direction | Group | GenBank accession no. |
|-----|-------------|----------|--------------|------------------|-------------------|-----------|-------|-----------------------|
| 1   | Fr3OR18.1   | F        | 18           | 100394           | 101347            | +         | κ     |                       |
| 2   | Fr3OR26.1   | P        | 26           | 215990           | 216862            | -         | η     |                       |
| 3   | Fr3OR26.2   | P        | 26           | 221714           | 222619            | +         | η     |                       |
| 4   | Fr3OR26.3   | P        | 26           | 224426           | 225118            | +         | η     |                       |
| 5   | Fr3OR26.4   | P        | 26           | 228694           | 229434            | +         | η     |                       |
| 6   | Fr3OR59.1   | F        | 59           | 101430           | 102383            | -         | η     |                       |
| 7   | Fr3OR117.1  | F        | 117          | 140937           | 141881            | -         | δ     |                       |
| 8   | Fr3OR117.2  | F        | 117          | 143302           | 144228            | -         | δ     |                       |
| 9   | Fr3OR119.1  | F        | 119          | 137360           | 138322            | +         | δ     |                       |
| 10  | Fr3OR123.1  | F        | 123          | 2211             | 3143              | +         | δ     |                       |
| 11  | Fr3OR123.2  | F        | 123          | 5390             | 6316              | +         | δ     |                       |
| 12  | Fr3OR142.1  | F        | 142          | 98405            | 99343             | +         | δ     |                       |
| 13  | Fr3OR142.2  | P        | 142          | 99899            | 100321            | +         | δ     |                       |
| 14  | Fr3OR142.3  | F        | 142          | 101754           | 102692            | +         | δ     |                       |
| 15  | Fr3OR142.4  | P        | 142          | 103735           | 104157            | +         | δ     |                       |
| 16  | Fr3OR142.5  | P        | 142          | 112427           | 113313            | +         | δ     |                       |
| 17  | Fr3OR142.6  | F        | 142          | 118748           | 119713            | +         | ε     |                       |
| 18  | Fr3OR142.7  | F        | 142          | 120730           | 121689            | +         | ε     |                       |
| 19  | Fr3OR144.1  | P        | 144          | 120812           | 121198            | +         | η     |                       |
| 20  | Fr3OR144.2  | P        | 144          | 124247           | 124867            | +         | η     |                       |
| 21  | Fr3OR217.1  | F        | 217          | 47081            | 48010             | -         | η     |                       |
| 22  | Fr3OR580.1  | P        | 580          | 2567             | 2902              | -         | δ     |                       |
| 23  | Fr3OR580.2  | P        | 580          | 4419             | 4796              | -         | δ     |                       |
| 24  | Fr3OR633.1  | F        | 633          | 29549            | 30526             | -         | θ     |                       |
| 25  | Fr3OR1026.1 | P        | 1026         | 74737            | 75635             | +         | δ     |                       |
| 26  | Fr3OR1026.2 | F        | 1026         | 80031            | 80975             | +         | δ     |                       |
| 27  | Fr3OR1367.1 | P        | 1367         | 4134             | 4343              | -         | η     |                       |
| 28  | Fr3OR2346.1 | F        | 2346         | 2852             | 3793              | -         | δ     |                       |
| 29  | Fr3OR2346.2 | F        | 2346         | 7810             | 8748              | +         | δ     |                       |
| 30  | Fr3OR2346.3 | F        | 2346         | 9917             | 10831             | +         | δ     |                       |
| 31  | Fr3OR2346.4 | F        | 2346         | 14672            | 15595             | +         | δ     |                       |
| 32  | Fr3OR2346.5 | F        | 2346         | 17587            | 18522             | +         | δ     |                       |
| 33  | Fr3OR2346.6 | P        | 2346         | 20386            | 20625             | +         | δ     |                       |
| 34  | Fr3OR2346.7 | F        | 2346         | 22890            | 23810             | +         | δ     |                       |
| 35  | Fr3OR2832.1 | P        | 2832         | 2962             | 3559              | +         | η     |                       |
| 36  | Fr3OR2910.1 | P        | 2910         | 11038            | 11307             | -         | η     |                       |
| 37  | Fr3OR2987.1 | P        | 2987         | 13333            | 13761             | -         | η     |                       |
| 38  | Fr3OR3154.1 | P        | 3154         | 17458            | 18154             | -         | ζ     |                       |
| 39  | Fr3OR3630.1 | F        | 3630         | 10680            | 11606             | -         | δ     |                       |
| 40  | Fr3OR3630.2 | P        | 3630         | 12866            | 13543             | -         | δ     |                       |
| 41  | Fr3OR3763.1 | F        | 3763         | 2165             | 3085              | +         | δ     |                       |
| 42  | Fr3OR3763.2 | F        | 3763         | 6404             | 7333              | +         | δ     |                       |
| 43  | Fr3OR3905.1 | F        | 3905         | 7962             | 8969              | +         | ζ     |                       |
| 44  | Fr3OR4133.1 | P        | 4133         | 15               | 320               | -         | δ     |                       |
| 45  | Fr3OR4133.2 | F        | 4133         | 3009             | 3959              | -         | δ     |                       |
| 46  | Fr3OR4133.3 | P        | 4133         | 8625             | 9119              | -         | δ     |                       |
| 47  | Fr3OR4208.1 | P        | 4208         | 4759             | 5628              | -         | η     |                       |
| 48  | Fr3OR4208.2 | P        | 4208         | 9444             | 10190             | -         | η     |                       |
| 49  | Fr3OR4208.3 | P        | 4208         | 13226            | 13960             | -         | η     |                       |
| 50  | Fr3OR4429.1 | F        | 4429         | 2980             | 3891              | -         | δ     |                       |
| 51  | Fr3OR4429.2 | F        | 4429         | 4755             | 5705              | +         | δ     |                       |
| 52  | Fr3OR4479.1 | P        | 4479         | 2                | 712               | +         | ζ     |                       |
| 53  | Fr3OR4479.2 | F        | 4479         | 6570             | 7541              | +         | ζ     | AB031381-1            |
| 54  | Fr3OR4563.1 | P        | 4563         | 2                | 250               | +         | δ     |                       |
| 55  | Fr3OR4563.2 | P        | 4563         | 1152             | 1433              | -         | δ     |                       |

|    |              |   |       |      |      |   |   |            |
|----|--------------|---|-------|------|------|---|---|------------|
| 56 | Fr3OR4563.3  | P | 4563  | 1676 | 1924 | - | δ |            |
| 57 | Fr3OR4563.4  | F | 4563  | 5006 | 5959 | + | δ |            |
| 58 | Fr3OR4563.5  | F | 4563  | 7223 | 8167 | - | δ |            |
| 59 | Fr3OR4563.6  | P | 4563  | 8643 | 8941 | + | δ |            |
| 60 | Fr3OR5287.1  | P | 5287  | 2    | 769  | + | δ |            |
| 61 | Fr3OR5287.2  | F | 5287  | 2492 | 3466 | - | β |            |
| 62 | Fr3OR5510.1  | P | 5510  | 3    | 464  | - | δ |            |
| 63 | Fr3OR5510.2  | F | 5510  | 5598 | 6554 | - | δ |            |
| 64 | Fr3OR5511.1  | P | 5511  | 3    | 545  | + | δ |            |
| 65 | Fr3OR5511.2  | F | 5511  | 4503 | 5420 | - | δ |            |
| 66 | Fr3OR5887.1  | P | 5887  | 902  | 1726 | - | δ |            |
| 67 | Fr3OR6030.1  | F | 6030  | 1325 | 2278 | - | η |            |
| 68 | Fr3OR6269.1  | F | 6269  | 1619 | 2590 | + | ζ | AB031382-1 |
| 69 | Fr3OR6392.1  | P | 6392  | 2742 | 3371 | + | η |            |
| 70 | Fr3OR6765.1  | F | 6765  | 455  | 1375 | - | δ |            |
| 71 | Fr3OR6818.1  | F | 6818  | 800  | 1738 | + | η |            |
| 72 | Fr3OR6828.1  | P | 6828  | 2539 | 3444 | - | δ |            |
| 73 | Fr3OR7011.1  | F | 7011  | 381  | 1313 | - | η |            |
| 74 | Fr3OR7149.1  | F | 7149  | 130  | 1071 | + | δ |            |
| 75 | Fr3OR7149.2  | P | 7149  | 2725 | 2994 | + | δ |            |
| 76 | Fr3OR7573.1  | P | 7573  | 2    | 742  | + | η |            |
| 77 | Fr3OR7743.1  | P | 7743  | 120  | 923  | + | δ |            |
| 78 | Fr3OR7903.1  | P | 7903  | 3042 | 3956 | + | η |            |
| 79 | Fr3OR8298.1  | F | 8298  | 929  | 1933 | - | δ |            |
| 80 | Fr3OR8617.1  | P | 8617  | 1904 | 2806 | - | δ |            |
| 81 | Fr3OR9714.1  | P | 9714  | 1127 | 1444 | - | δ |            |
| 82 | Fr3OR10066.1 | P | 10066 | 623  | 1012 | + | η |            |
| 83 | Fr3OR11088.1 | P | 11088 | 757  | 1185 | - | δ |            |
| 84 | Fr3OR11306.1 | P | 11306 | 429  | 1133 | - | η |            |
| 85 | Fr3OR15667.1 | P | 15667 | 476  | 793  | - | δ |            |
| 86 | Fr3OR17180.1 | P | 17180 | 612  | 770  | - | δ |            |
| 87 | Fr3OR17710.1 | P | 17710 | 9    | 569  | + | η |            |
| 88 | Fr3OR17835.1 | P | 17835 | 428  | 736  | + | δ |            |
| 89 | Fr3OR17891.1 | P | 17891 | 54   | 743  | + | δ |            |
| 90 | Fr3OR18144.1 | P | 18144 | 170  | 727  | + | δ |            |
| 91 | Fr3OR19594.1 | P | 19594 | 75   | 401  | - | δ |            |
| 92 | Fr3OR19618.1 | P | 19618 | 30   | 575  | - | δ |            |
| 93 | Fr3OR19976.1 | P | 19976 | 11   | 559  | - | δ |            |
| 94 | Fr3OR25497.1 | P | 25497 | 35   | 337  | - | δ |            |
| 95 | AB031380-1   | F |       |      |      |   | ζ |            |
| 96 | AB031383-1   | F |       |      |      |   | ζ |            |
| 97 | AB031384-1   | F |       |      |      |   | ζ |            |
| 98 | AB031385-1   | F |       |      |      |   | δ |            |

\* F, a functional gene; P, a pseudogene or a partial sequence.
