# Supplementary material
Source: PubMed Central journal article supplement (PMC1087945)
Supplement: pnas_102_17_6039__5.pdf [file pnas_102_17_6039__5.pdf]

**Table 6. OR genes in the chicken genome**

| No. | Gene name  | F or P * | Chromosome no. | Initial position | Terminal position | Direction | Group | GenBank accession no. |
|-----|------------|----------|----------------|------------------|-------------------|-----------|-------|-----------------------|
| 1   | Gg2OR1.1   | F        | 1              | 71566417         | 71567418          | +         | Y     |                       |
| 2   | Gg2OR1.2   | F        | 1              | 188062923        | 188063897         | +         | α     |                       |
| 3   | Gg2OR1.3   | F        | 1              | 188075982        | 188076941         | +         | α     |                       |
| 4   | Gg2OR1.4   | P        | 1              | 188086770        | 188087660         | -         | α     |                       |
| 5   | Gg2OR1.5   | P        | 1              | 188111519        | 188112152         | -         | α     |                       |
| 6   | Gg2OR1.6   | F        | 1              | 188143846        | 188144805         | +         | α     | L17432-5              |
| 7   | Gg2OR1.7   | F        | 1              | 188149915        | 188150862         | -         | α     |                       |
| 8   | Gg2OR1.8   | F        | 1              | 188160002        | 188160994         | -         | α     |                       |
| 9   | Gg2OR1.9   | F        | 1              | 188166217        | 188167173         | -         | α     |                       |
| 10  | Gg2OR1.10  | F        | 1              | 188171136        | 188172110         | -         | α     |                       |
| 11  | Gg2OR1.11  | P        | 1              | 188188437        | 188189033         | -         | α     |                       |
| 12  | Gg2OR1.12  | F        | 1              | 188201439        | 188202401         | +         | α     |                       |
| 13  | Gg2OR1.13  | P        | 1              | 188205287        | 188206039         | +         | α     |                       |
| 14  | Gg2OR5.1   | P        | 5              | 44099            | 44266             | +         | Y     |                       |
| 15  | Gg2OR5.2   | F        | 5              | 53175            | 54134             | -         | Y     |                       |
| 16  | Gg2OR5.3   | F        | 5              | 58200            | 59213             | +         | Y     |                       |
| 17  | Gg2OR5.4   | F        | 5              | 61813            | 62757             | +         | Y     | X94742-1              |
| 18  | Gg2OR5.5   | F        | 5              | 74251            | 75189             | +         | Y     | X94744-1              |
| 19  | Gg2OR5.6   | P        | 5              | 76066            | 76605             | +         | Y     |                       |
| 20  | Gg2OR5.7   | F        | 5              | 81775            | 82728             | -         | Y     |                       |
| 21  | Gg2OR5.8   | F        | 5              | 2064890          | 2065837           | +         | Y     |                       |
| 22  | Gg2OR5.9   | F        | 5              | 2070774          | 2071712           | +         | Y     | Z79590-1              |
| 23  | Gg2OR5.10  | F        | 5              | 2073803          | 2074741           | +         | Y     |                       |
| 24  | Gg2OR5.11  | F        | 5              | 2399824          | 2400777           | -         | Y     |                       |
| 25  | Gg2OR5.12  | P        | 5              | 2404960          | 2405232           | -         | Y     |                       |
| 26  | Gg2OR5.13  | F        | 5              | 2407809          | 2408765           | -         | Y     | Z79584-1              |
| 27  | Gg2OR5.14  | F        | 5              | 2412324          | 2413262           | -         | Y     | X94743-1              |
| 28  | Gg2OR5.15  | F        | 5              | 2417101          | 2418039           | -         | Y     |                       |
| 29  | Gg2OR5.16  | P        | 5              | 2420644          | 2420985           | -         | Y     |                       |
| 30  | Gg2OR5.17  | F        | 5              | 2425474          | 2426412           | +         | Y     | Z79593-1              |
| 31  | Gg2OR5.18  | P        | 5              | 2428198          | 2428440           | +         | Y     |                       |
| 32  | Gg2OR5.19  | F        | 5              | 2430269          | 2431216           | +         | Y     |                       |
| 33  | Gg2OR9.1   | F        | 9              | 1968299          | 1969339           | +         | θ     |                       |
| 34  | Gg2OR10.1  | F        | 10             | 1822881          | 1823885           | -         | Y     |                       |
| 35  | Gg2OR10.2  | F        | 10             | 1828902          | 1829876           | -         | Y     |                       |
| 36  | Gg2OR10.3  | P        | 10             | 1842999          | 1843682           | -         | Y     |                       |
| 37  | Gg2OR10.4  | F        | 10             | 1849287          | 1850246           | +         | Y     |                       |
| 38  | Gg2OR10.5  | F        | 10             | 1856006          | 1856977           | -         | Y     | Z79586-1              |
| 39  | Gg2OR11.1  | P        | 11             | 2546725          | 2547439           | +         | Y     |                       |
| 40  | Gg2OR17.1  | F        | 17             | 10350014         | 10351045          | +         | Y     |                       |
| 41  | Gg2OR17.2  | P        | 17             | 10618618         | 10618865          | +         | Y     |                       |
| 42  | Gg2OR18.1  | P        | 18             | 30737            | 31262             | +         | Y     |                       |
| 43  | Gg2OR27.1  | F        | 27             | 14389            | 15321             | -         | Y     |                       |
| 44  | Gg2OR27.2  | P        | 27             | 19096            | 19947             | -         | Y     |                       |
| 45  | Gg2OR27.3  | F        | 27             | 26203            | 27138             | -         | Y     |                       |
| 46  | Gg2ORUn.1  | F        | Un             | 6075884          | 6076867           | +         | Y     |                       |
| 47  | Gg2ORUn.2  | P        | Un             | 11071156         | 11071716          | +         | Y     |                       |
| 48  | Gg2ORUn.3  | P        | Un             | 11121058         | 11121366          | -         | Y     |                       |
| 49  | Gg2ORUn.4  | P        | Un             | 11222351         | 11223052          | +         | Y     |                       |
| 50  | Gg2ORUn.5  | P        | Un             | 11224369         | 11224896          | +         | Y     |                       |
| 51  | Gg2ORUn.6  | P        | Un             | 12095560         | 12096159          | -         | Y     |                       |
| 52  | Gg2ORUn.7  | P        | Un             | 12193872         | 12194252          | +         | Y     |                       |
| 53  | Gg2ORUn.8  | P        | Un             | 12252264         | 12252839          | +         | Y     |                       |
| 54  | Gg2ORUn.9  | P        | Un             | 12371194         | 12371916          | +         | Y     |                       |
| 55  | Gg2ORUn.10 | P        | Un             | 12374483         | 12375277          | -         | Y     |                       |

|     |            |   |    |          |          |   |   |  |
|-----|------------|---|----|----------|----------|---|---|--|
| 56  | Gg2ORUn.11 | P | Un | 12375382 | 12375621 | - | Y |  |
| 57  | Gg2ORUn.12 | P | Un | 12386360 | 12386881 | - | Y |  |
| 58  | Gg2ORUn.13 | P | Un | 12614410 | 12614985 | + | Y |  |
| 59  | Gg2ORUn.14 | P | Un | 12920979 | 12921854 | + | Y |  |
| 60  | Gg2ORUn.15 | P | Un | 12937574 | 12938458 | - | Y |  |
| 61  | Gg2ORUn.16 | P | Un | 13559469 | 13559918 | - | Y |  |
| 62  | Gg2ORUn.17 | P | Un | 13729860 | 13730492 | - | Y |  |
| 63  | Gg2ORUn.18 | P | Un | 13822205 | 13823098 | + | Y |  |
| 64  | Gg2ORUn.19 | P | Un | 13838496 | 13839002 | + | Y |  |
| 65  | Gg2ORUn.20 | P | Un | 13946769 | 13947544 | - | Y |  |
| 66  | Gg2ORUn.21 | F | Un | 13955666 | 13956607 | - | Y |  |
| 67  | Gg2ORUn.22 | P | Un | 14228089 | 14228781 | - | Y |  |
| 68  | Gg2ORUn.23 | P | Un | 14612253 | 14612963 | + | Y |  |
| 69  | Gg2ORUn.24 | P | Un | 15028908 | 15029351 | - | Y |  |
| 70  | Gg2ORUn.25 | P | Un | 15192521 | 15192790 | + | Y |  |
| 71  | Gg2ORUn.26 | P | Un | 15203458 | 15203661 | - | Y |  |
| 72  | Gg2ORUn.27 | F | Un | 15206979 | 15207914 | + | Y |  |
| 73  | Gg2ORUn.28 | F | Un | 15213222 | 15214196 | + | Y |  |
| 74  | Gg2ORUn.29 | P | Un | 15214416 | 15214832 | + | Y |  |
| 75  | Gg2ORUn.30 | F | Un | 15655851 | 15656813 | - | Y |  |
| 76  | Gg2ORUn.31 | P | Un | 15880993 | 15881559 | + | Y |  |
| 77  | Gg2ORUn.32 | P | Un | 15975053 | 15975334 | + | Y |  |
| 78  | Gg2ORUn.33 | F | Un | 16520197 | 16521156 | - | Y |  |
| 79  | Gg2ORUn.34 | P | Un | 16914473 | 16914781 | - | Y |  |
| 80  | Gg2ORUn.35 | P | Un | 17147780 | 17148547 | + | Y |  |
| 81  | Gg2ORUn.36 | P | Un | 18337510 | 18338253 | - | Y |  |
| 82  | Gg2ORUn.37 | P | Un | 19347491 | 19348081 | - | Y |  |
| 83  | Gg2ORUn.38 | P | Un | 19446339 | 19447169 | - | Y |  |
| 84  | Gg2ORUn.39 | P | Un | 20371811 | 20372515 | - | Y |  |
| 85  | Gg2ORUn.40 | P | Un | 20860482 | 20861015 | - | Y |  |
| 86  | Gg2ORUn.41 | P | Un | 21060326 | 21060928 | + | Y |  |
| 87  | Gg2ORUn.42 | P | Un | 21139089 | 21139682 | + | Y |  |
| 88  | Gg2ORUn.43 | P | Un | 21159845 | 21160720 | + | Y |  |
| 89  | Gg2ORUn.44 | P | Un | 21465259 | 21465618 | - | Y |  |
| 90  | Gg2ORUn.45 | P | Un | 21545573 | 21546106 | - | Y |  |
| 91  | Gg2ORUn.46 | P | Un | 22505808 | 22506467 | - | Y |  |
| 92  | Gg2ORUn.47 | P | Un | 22981143 | 22981721 | - | Y |  |
| 93  | Gg2ORUn.48 | P | Un | 23450268 | 23451071 | - | Y |  |
| 94  | Gg2ORUn.49 | P | Un | 24171254 | 24172024 | - | Y |  |
| 95  | Gg2ORUn.50 | P | Un | 24172135 | 24172641 | - | Y |  |
| 96  | Gg2ORUn.51 | F | Un | 24878623 | 24879558 | - | Y |  |
| 97  | Gg2ORUn.52 | P | Un | 24885386 | 24885613 | + | Y |  |
| 98  | Gg2ORUn.53 | P | Un | 24886096 | 24886428 | + | Y |  |
| 99  | Gg2ORUn.54 | F | Un | 24890560 | 24891495 | - | Y |  |
| 100 | Gg2ORUn.55 | P | Un | 24910412 | 24911011 | + | Y |  |
| 101 | Gg2ORUn.56 | P | Un | 25324882 | 25325205 | + | Y |  |
| 102 | Gg2ORUn.57 | P | Un | 25353109 | 25353657 | - | Y |  |
| 103 | Gg2ORUn.58 | P | Un | 25714127 | 25714471 | + | Y |  |
| 104 | Gg2ORUn.59 | P | Un | 25809904 | 25810146 | + | Y |  |
| 105 | Gg2ORUn.60 | P | Un | 26099328 | 26099699 | - | Y |  |
| 106 | Gg2ORUn.61 | F | Un | 26758093 | 26759040 | - | α |  |
| 107 | Gg2ORUn.62 | P | Un | 27016518 | 27017171 | - | Y |  |
| 108 | Gg2ORUn.63 | P | Un | 27020064 | 27020623 | - | Y |  |
| 109 | Gg2ORUn.64 | P | Un | 27084750 | 27085283 | - | Y |  |
| 110 | Gg2ORUn.65 | P | Un | 27400149 | 27400514 | + | Y |  |
| 111 | Gg2ORUn.66 | F | Un | 27496486 | 27497421 | - | Y |  |
| 112 | Gg2ORUn.67 | P | Un | 28125548 | 28126051 | + | Y |  |
| 113 | Gg2ORUn.68 | P | Un | 29961036 | 29961431 | + | Y |  |
| 114 | Gg2ORUn.69 | P | Un | 31206669 | 31207166 | - | Y |  |

|     |             |   |    |          |          |   |   |  |
|-----|-------------|---|----|----------|----------|---|---|--|
| 115 | Gg2ORUn.70  | F | Un | 31214649 | 31215584 | - | Y |  |
| 116 | Gg2ORUn.71  | P | Un | 32718539 | 32718826 | + | Y |  |
| 117 | Gg2ORUn.72  | P | Un | 34167071 | 34167967 | - | Y |  |
| 118 | Gg2ORUn.73  | P | Un | 35286344 | 35286631 | + | Y |  |
| 119 | Gg2ORUn.74  | P | Un | 35404809 | 35405192 | + | Y |  |
| 120 | Gg2ORUn.75  | P | Un | 35916893 | 35917657 | - | Y |  |
| 121 | Gg2ORUn.76  | P | Un | 36627675 | 36628199 | + | Y |  |
| 122 | Gg2ORUn.77  | P | Un | 37336470 | 37337036 | + | Y |  |
| 123 | Gg2ORUn.78  | P | Un | 37904420 | 37904803 | - | Y |  |
| 124 | Gg2ORUn.79  | P | Un | 38683744 | 38684301 | + | Y |  |
| 125 | Gg2ORUn.80  | F | Un | 39865234 | 39866199 | - | Y |  |
| 126 | Gg2ORUn.81  | P | Un | 39981785 | 39982387 | + | Y |  |
| 127 | Gg2ORUn.82  | P | Un | 40016567 | 40017175 | - | Y |  |
| 128 | Gg2ORUn.83  | P | Un | 40038807 | 40039046 | - | Y |  |
| 129 | Gg2ORUn.84  | F | Un | 40047223 | 40048182 | + | Y |  |
| 130 | Gg2ORUn.85  | P | Un | 40176430 | 40176807 | + | Y |  |
| 131 | Gg2ORUn.86  | P | Un | 40238425 | 40238808 | + | Y |  |
| 132 | Gg2ORUn.87  | P | Un | 40241269 | 40241979 | - | Y |  |
| 133 | Gg2ORUn.88  | F | Un | 40246157 | 40247098 | - | Y |  |
| 134 | Gg2ORUn.89  | P | Un | 40258985 | 40259455 | + | Y |  |
| 135 | Gg2ORUn.90  | P | Un | 40344706 | 40345377 | + | Y |  |
| 136 | Gg2ORUn.91  | P | Un | 41114532 | 41115089 | - | Y |  |
| 137 | Gg2ORUn.92  | P | Un | 41119996 | 41120562 | - | Y |  |
| 138 | Gg2ORUn.93  | P | Un | 41122409 | 41123149 | - | Y |  |
| 139 | Gg2ORUn.94  | P | Un | 41887503 | 41887757 | - | Y |  |
| 140 | Gg2ORUn.95  | P | Un | 42208849 | 42209586 | + | Y |  |
| 141 | Gg2ORUn.96  | F | Un | 42320401 | 42321336 | + | Y |  |
| 142 | Gg2ORUn.97  | P | Un | 42875177 | 42875854 | + | Y |  |
| 143 | Gg2ORUn.98  | P | Un | 42883482 | 42884117 | + | Y |  |
| 144 | Gg2ORUn.99  | P | Un | 42894584 | 42895045 | - | Y |  |
| 145 | Gg2ORUn.100 | P | Un | 42955751 | 42956488 | + | Y |  |
| 146 | Gg2ORUn.101 | P | Un | 43063692 | 43063985 | + | Y |  |
| 147 | Gg2ORUn.102 | P | Un | 43197716 | 43198462 | + | Y |  |
| 148 | Gg2ORUn.103 | F | Un | 43200583 | 43201545 | - | Y |  |
| 149 | Gg2ORUn.104 | P | Un | 43936919 | 43937713 | - | Y |  |
| 150 | Gg2ORUn.105 | P | Un | 43939741 | 43940256 | - | Y |  |
| 151 | Gg2ORUn.106 | P | Un | 44000847 | 44001023 | - | Y |  |
| 152 | Gg2ORUn.107 | P | Un | 44003915 | 44004496 | + | Y |  |
| 153 | Gg2ORUn.108 | P | Un | 44008994 | 44009313 | - | Y |  |
| 154 | Gg2ORUn.109 | P | Un | 44011158 | 44011595 | - | Y |  |
| 155 | Gg2ORUn.110 | P | Un | 44102511 | 44102675 | - | Y |  |
| 156 | Gg2ORUn.111 | P | Un | 45292518 | 45292855 | - | Y |  |
| 157 | Gg2ORUn.112 | P | Un | 46128567 | 46129391 | - | Y |  |
| 158 | Gg2ORUn.113 | P | Un | 46651309 | 46652118 | - | Y |  |
| 159 | Gg2ORUn.114 | P | Un | 46829604 | 46830302 | + | Y |  |
| 160 | Gg2ORUn.115 | P | Un | 47486443 | 47486979 | - | Y |  |
| 161 | Gg2ORUn.116 | P | Un | 49841531 | 49842388 | + | Y |  |
| 162 | Gg2ORUn.117 | P | Un | 50113876 | 50114208 | + | Y |  |
| 163 | Gg2ORUn.118 | P | Un | 50114440 | 50114736 | - | Y |  |
| 164 | Gg2ORUn.119 | P | Un | 50118831 | 50119301 | + | Y |  |
| 165 | Gg2ORUn.120 | P | Un | 50319309 | 50320100 | - | Y |  |
| 166 | Gg2ORUn.121 | P | Un | 50327679 | 50328245 | + | Y |  |
| 167 | Gg2ORUn.122 | P | Un | 51005929 | 51006570 | - | Y |  |
| 168 | Gg2ORUn.123 | P | Un | 51023870 | 51024304 | - | Y |  |
| 169 | Gg2ORUn.124 | P | Un | 51585155 | 51585721 | + | Y |  |
| 170 | Gg2ORUn.125 | P | Un | 51721461 | 51722141 | - | Y |  |
| 171 | Gg2ORUn.126 | P | Un | 51837468 | 51837851 | - | Y |  |
| 172 | Gg2ORUn.127 | P | Un | 53567420 | 53568217 | - | Y |  |

|     |             |   |    |          |          |   |   |  |
|-----|-------------|---|----|----------|----------|---|---|--|
| 173 | Gg2ORUn.128 | P | Un | 54055922 | 54056305 | + | Y |  |
| 174 | Gg2ORUn.129 | P | Un | 54708243 | 54709083 | + | Y |  |
| 175 | Gg2ORUn.130 | P | Un | 54710948 | 54711241 | - | Y |  |
| 176 | Gg2ORUn.131 | F | Un | 54888828 | 54889763 | - | Y |  |
| 177 | Gg2ORUn.132 | P | Un | 54897882 | 54898544 | + | Y |  |
| 178 | Gg2ORUn.133 | F | Un | 55943696 | 55944631 | - | Y |  |
| 179 | Gg2ORUn.134 | P | Un | 56008789 | 56009355 | + | Y |  |
| 180 | Gg2ORUn.135 | P | Un | 57751248 | 57751484 | - | Y |  |
| 181 | Gg2ORUn.136 | P | Un | 57805397 | 57806077 | + | Y |  |
| 182 | Gg2ORUn.137 | P | Un | 57835342 | 57835725 | - | Y |  |
| 183 | Gg2ORUn.138 | F | Un | 57842380 | 57843342 | + | Y |  |
| 184 | Gg2ORUn.139 | P | Un | 58339929 | 58340666 | - | Y |  |
| 185 | Gg2ORUn.140 | P | Un | 58871159 | 58871458 | - | Y |  |
| 186 | Gg2ORUn.141 | P | Un | 60157443 | 60158183 | - | Y |  |
| 187 | Gg2ORUn.142 | F | Un | 60223278 | 60224213 | - | Y |  |
| 188 | Gg2ORUn.143 | P | Un | 60315827 | 60316471 | - | Y |  |
| 189 | Gg2ORUn.144 | P | Un | 62656625 | 62656999 | + | Y |  |
| 190 | Gg2ORUn.145 | P | Un | 62658900 | 62659529 | - | Y |  |
| 191 | Gg2ORUn.146 | P | Un | 62664438 | 62664959 | - | Y |  |
| 192 | Gg2ORUn.147 | P | Un | 63979098 | 63979853 | - | Y |  |
| 193 | Gg2ORUn.148 | P | Un | 64794232 | 64794618 | + | Y |  |
| 194 | Gg2ORUn.149 | P | Un | 64824101 | 64824478 | - | Y |  |
| 195 | Gg2ORUn.150 | F | Un | 65313654 | 65314637 | - | Y |  |
| 196 | Gg2ORUn.151 | P | Un | 65319907 | 65320476 | - | Y |  |
| 197 | Gg2ORUn.152 | P | Un | 65754457 | 65755023 | + | Y |  |
| 198 | Gg2ORUn.153 | P | Un | 66033706 | 66034308 | - | Y |  |
| 199 | Gg2ORUn.154 | P | Un | 66355253 | 66355531 | + | Y |  |
| 200 | Gg2ORUn.155 | F | Un | 66786396 | 66787355 | + | Y |  |
| 201 | Gg2ORUn.156 | P | Un | 68366991 | 68367380 | + | Y |  |
| 202 | Gg2ORUn.157 | P | Un | 68411905 | 68412648 | + | Y |  |
| 203 | Gg2ORUn.158 | P | Un | 68632400 | 68633042 | + | Y |  |
| 204 | Gg2ORUn.159 | P | Un | 68887411 | 68887818 | - | Y |  |
| 205 | Gg2ORUn.160 | P | Un | 68897153 | 68897932 | - | Y |  |
| 206 | Gg2ORUn.161 | P | Un | 68929495 | 68930184 | - | Y |  |
| 207 | Gg2ORUn.162 | P | Un | 69612330 | 69612962 | - | Y |  |
| 208 | Gg2ORUn.163 | P | Un | 69617438 | 69617953 | - | Y |  |
| 209 | Gg2ORUn.164 | P | Un | 70033599 | 70034219 | + | Y |  |
| 210 | Gg2ORUn.165 | P | Un | 70811100 | 70811663 | - | Y |  |
| 211 | Gg2ORUn.166 | P | Un | 72173400 | 72174023 | - | Y |  |
| 212 | Gg2ORUn.167 | P | Un | 72639466 | 72640371 | + | Y |  |
| 213 | Gg2ORUn.168 | P | Un | 72643052 | 72643690 | - | Y |  |
| 214 | Gg2ORUn.169 | P | Un | 73470489 | 73471256 | + | Y |  |
| 215 | Gg2ORUn.170 | P | Un | 73492649 | 73493188 | - | Y |  |
| 216 | Gg2ORUn.171 | F | Un | 73660256 | 73661221 | - | Y |  |
| 217 | Gg2ORUn.172 | P | Un | 73746349 | 73746657 | + | Y |  |
| 218 | Gg2ORUn.173 | P | Un | 74182180 | 74182848 | - | Y |  |
| 219 | Gg2ORUn.174 | P | Un | 74274129 | 74274425 | + | Y |  |
| 220 | Gg2ORUn.175 | P | Un | 74276045 | 74276608 | + | Y |  |
| 221 | Gg2ORUn.176 | P | Un | 74277122 | 74277406 | + | Y |  |
| 222 | Gg2ORUn.177 | P | Un | 74913974 | 74914684 | + | Y |  |
| 223 | Gg2ORUn.178 | P | Un | 75336212 | 75336859 | + | Y |  |
| 224 | Gg2ORUn.179 | P | Un | 75667661 | 75668029 | + | Y |  |
| 225 | Gg2ORUn.180 | P | Un | 76213589 | 76214218 | - | Y |  |
| 226 | Gg2ORUn.181 | P | Un | 76580266 | 76580640 | + | Y |  |
| 227 | Gg2ORUn.182 | P | Un | 76659785 | 76660567 | + | Y |  |
| 228 | Gg2ORUn.183 | F | Un | 77380059 | 77381021 | - | Y |  |
| 229 | Gg2ORUn.184 | P | Un | 77486651 | 77487214 | + | Y |  |
| 230 | Gg2ORUn.185 | P | Un | 78594193 | 78594846 | - | Y |  |
| 231 | Gg2ORUn.186 | P | Un | 78650290 | 78650847 | + | Y |  |

|     |             |   |    |          |          |   |   |  |
|-----|-------------|---|----|----------|----------|---|---|--|
| 232 | Gg2ORUn.187 | P | Un | 79374524 | 79375066 | + | Y |  |
| 233 | Gg2ORUn.188 | P | Un | 79437395 | 79437898 | - | Y |  |
| 234 | Gg2ORUn.189 | F | Un | 80822300 | 80823283 | + | Y |  |
| 235 | Gg2ORUn.190 | P | Un | 81021575 | 81022336 | + | Y |  |
| 236 | Gg2ORUn.191 | P | Un | 81421217 | 81421525 | + | Y |  |
| 237 | Gg2ORUn.192 | P | Un | 81454480 | 81454815 | - | Y |  |
| 238 | Gg2ORUn.193 | P | Un | 81750848 | 81751435 | - | Y |  |
| 239 | Gg2ORUn.194 | P | Un | 82022625 | 82023092 | + | Y |  |
| 240 | Gg2ORUn.195 | P | Un | 82437157 | 82437465 | - | Y |  |
| 241 | Gg2ORUn.196 | F | Un | 82438539 | 82439501 | - | Y |  |
| 242 | Gg2ORUn.197 | P | Un | 83082142 | 83082429 | + | Y |  |
| 243 | Gg2ORUn.198 | P | Un | 84352269 | 84352508 | + | Y |  |
| 244 | Gg2ORUn.199 | P | Un | 84737916 | 84738380 | + | Y |  |
| 245 | Gg2ORUn.200 | P | Un | 85223388 | 85223990 | + | Y |  |
| 246 | Gg2ORUn.201 | P | Un | 85546390 | 85546614 | + | Y |  |
| 247 | Gg2ORUn.202 | F | Un | 85953430 | 85954416 | - | Y |  |
| 248 | Gg2ORUn.203 | P | Un | 86883111 | 86883899 | - | Y |  |
| 249 | Gg2ORUn.204 | P | Un | 86887871 | 86888542 | - | Y |  |
| 250 | Gg2ORUn.205 | P | Un | 87278653 | 87279150 | - | Y |  |
| 251 | Gg2ORUn.206 | P | Un | 87285387 | 87285830 | + | Y |  |
| 252 | Gg2ORUn.207 | P | Un | 87531064 | 87531852 | - | Y |  |
| 253 | Gg2ORUn.208 | P | Un | 87538183 | 87538932 | + | Y |  |
| 254 | Gg2ORUn.209 | P | Un | 87746849 | 87747559 | + | Y |  |
| 255 | Gg2ORUn.210 | P | Un | 88707449 | 88708222 | + | Y |  |
| 256 | Gg2ORUn.211 | P | Un | 89088359 | 89088613 | + | Y |  |
| 257 | Gg2ORUn.212 | P | Un | 89315113 | 89315817 | + | Y |  |
| 258 | Gg2ORUn.213 | P | Un | 89446477 | 89446770 | + | Y |  |
| 259 | Gg2ORUn.214 | F | Un | 89583540 | 89584499 | + | Y |  |
| 260 | Gg2ORUn.215 | P | Un | 89992451 | 89993347 | - | Y |  |
| 261 | Gg2ORUn.216 | P | Un | 90282001 | 90282306 | - | Y |  |
| 262 | Gg2ORUn.217 | P | Un | 90831268 | 90831978 | + | Y |  |
| 263 | Gg2ORUn.218 | P | Un | 91287643 | 91288089 | - | Y |  |
| 264 | Gg2ORUn.219 | P | Un | 92218881 | 92219585 | - | Y |  |
| 265 | Gg2ORUn.220 | P | Un | 92244184 | 92244579 | + | Y |  |
| 266 | Gg2ORUn.221 | P | Un | 92537498 | 92538027 | - | Y |  |
| 267 | Gg2ORUn.222 | P | Un | 92968605 | 92968982 | + | Y |  |
| 268 | Gg2ORUn.223 | P | Un | 92973860 | 92974504 | - | Y |  |
| 269 | Gg2ORUn.224 | P | Un | 93511739 | 93512458 | - | Y |  |
| 270 | Gg2ORUn.225 | P | Un | 93516805 | 93517086 | - | Y |  |
| 271 | Gg2ORUn.226 | P | Un | 94102358 | 94102819 | + | Y |  |
| 272 | Gg2ORUn.227 | P | Un | 94171471 | 94172187 | + | Y |  |
| 273 | Gg2ORUn.228 | P | Un | 94175467 | 94175934 | - | Y |  |
| 274 | Gg2ORUn.229 | P | Un | 94246250 | 94246852 | + | Y |  |
| 275 | Gg2ORUn.230 | P | Un | 94391532 | 94392098 | - | Y |  |
| 276 | Gg2ORUn.231 | P | Un | 95421941 | 95422253 | - | Y |  |
| 277 | Gg2ORUn.232 | P | Un | 95839625 | 95840059 | - | Y |  |
| 278 | Gg2ORUn.233 | P | Un | 95927572 | 95928246 | + | Y |  |
| 279 | Gg2ORUn.234 | P | Un | 96760838 | 96761479 | + | Y |  |
| 280 | Gg2ORUn.235 | P | Un | 96821499 | 96822149 | + | Y |  |
| 281 | Gg2ORUn.236 | P | Un | 96858917 | 96859672 | - | Y |  |
| 282 | Gg2ORUn.237 | P | Un | 97609044 | 97609610 | - | Y |  |
| 283 | Gg2ORUn.238 | P | Un | 98193550 | 98193891 | + | Y |  |
| 284 | Gg2ORUn.239 | P | Un | 98194387 | 98194881 | - | Y |  |
| 285 | Gg2ORUn.240 | P | Un | 98352927 | 98353544 | - | Y |  |
| 286 | Gg2ORUn.241 | P | Un | 98619181 | 98619420 | + | Y |  |
| 287 | Gg2ORUn.242 | P | Un | 98619576 | 98620217 | + | Y |  |
| 288 | Gg2ORUn.243 | P | Un | 99044314 | 99044601 | - | Y |  |
| 289 | Gg2ORUn.244 | P | Un | 99120466 | 99120819 | + | Y |  |

|     |             |   |    |           |           |   |   |  |
|-----|-------------|---|----|-----------|-----------|---|---|--|
| 290 | Gg2ORUn.245 | P | Un | 99121389  | 99121652  | + | Y |  |
| 291 | Gg2ORUn.246 | P | Un | 99125426  | 99126118  | - | Y |  |
| 292 | Gg2ORUn.247 | P | Un | 99761229  | 99761612  | - | Y |  |
| 293 | Gg2ORUn.248 | P | Un | 99762408  | 99762707  | + | Y |  |
| 294 | Gg2ORUn.249 | P | Un | 100140449 | 100141024 | - | Y |  |
| 295 | Gg2ORUn.250 | P | Un | 101040566 | 101041165 | - | Y |  |
| 296 | Gg2ORUn.251 | P | Un | 101381950 | 101382417 | - | Y |  |
| 297 | Gg2ORUn.252 | P | Un | 101983466 | 101984161 | - | Y |  |
| 298 | Gg2ORUn.253 | P | Un | 102062827 | 102063321 | + | Y |  |
| 299 | Gg2ORUn.254 | P | Un | 102496845 | 102497411 | + | Y |  |
| 300 | Gg2ORUn.255 | F | Un | 102660571 | 102661512 | + | Y |  |
| 301 | Gg2ORUn.256 | P | Un | 102699137 | 102699702 | + | Y |  |
| 302 | Gg2ORUn.257 | P | Un | 102704766 | 102705509 | - | Y |  |
| 303 | Gg2ORUn.258 | P | Un | 103245455 | 103246012 | - | Y |  |
| 304 | Gg2ORUn.259 | P | Un | 103400607 | 103401230 | - | Y |  |
| 305 | Gg2ORUn.260 | P | Un | 103407413 | 103408039 | - | Y |  |
| 306 | Gg2ORUn.261 | P | Un | 105030455 | 105030889 | - | Y |  |
| 307 | Gg2ORUn.262 | P | Un | 105041057 | 105041650 | + | Y |  |
| 308 | Gg2ORUn.263 | P | Un | 105046877 | 105047701 | - | Y |  |
| 309 | Gg2ORUn.264 | P | Un | 105070127 | 105070933 | + | Y |  |
| 310 | Gg2ORUn.265 | P | Un | 105073458 | 105074036 | - | Y |  |
| 311 | Gg2ORUn.266 | P | Un | 105092971 | 105093543 | + | Y |  |
| 312 | Gg2ORUn.267 | P | Un | 105244994 | 105245290 | - | Y |  |
| 313 | Gg2ORUn.268 | P | Un | 105301789 | 105302367 | + | Y |  |
| 314 | Gg2ORUn.269 | P | Un | 105392245 | 105392592 | + | Y |  |
| 315 | Gg2ORUn.270 | P | Un | 105883733 | 105884107 | - | Y |  |
| 316 | Gg2ORUn.271 | P | Un | 105890041 | 105890508 | + | Y |  |
| 317 | Gg2ORUn.272 | P | Un | 107555554 | 107556048 | - | Y |  |
| 318 | Gg2ORUn.273 | P | Un | 107711455 | 107711991 | - | Y |  |
| 319 | Gg2ORUn.274 | P | Un | 107823273 | 107823485 | - | Y |  |
| 320 | Gg2ORUn.275 | P | Un | 107912757 | 107913140 | + | Y |  |
| 321 | Gg2ORUn.276 | P | Un | 108051470 | 108052078 | - | Y |  |
| 322 | Gg2ORUn.277 | P | Un | 108366641 | 108367438 | - | Y |  |
| 323 | Gg2ORUn.278 | P | Un | 108481832 | 108482299 | + | Y |  |
| 324 | Gg2ORUn.279 | P | Un | 108571094 | 108571462 | - | Y |  |
| 325 | Gg2ORUn.280 | P | Un | 108865627 | 108866007 | - | Y |  |
| 326 | Gg2ORUn.281 | P | Un | 108875188 | 108876036 | - | Y |  |
| 327 | Gg2ORUn.282 | P | Un | 108955572 | 108956246 | + | Y |  |
| 328 | Gg2ORUn.283 | P | Un | 108985287 | 108985682 | + | Y |  |
| 329 | Gg2ORUn.284 | P | Un | 109205652 | 109205903 | + | Y |  |
| 330 | Gg2ORUn.285 | P | Un | 109348903 | 109349115 | + | Y |  |
| 331 | Gg2ORUn.286 | P | Un | 109492190 | 109492660 | + | Y |  |
| 332 | Gg2ORUn.287 | P | Un | 109662612 | 109663322 | + | Y |  |
| 333 | Gg2ORUn.288 | F | Un | 109691775 | 109692728 | - | Y |  |
| 334 | Gg2ORUn.289 | P | Un | 109706571 | 109707359 | + | Y |  |
| 335 | Gg2ORUn.290 | F | Un | 109791886 | 109792809 | + | Y |  |
| 336 | Gg2ORUn.291 | P | Un | 110171355 | 110171627 | + | Y |  |
| 337 | Gg2ORUn.292 | P | Un | 110200840 | 110201436 | - | Y |  |
| 338 | Gg2ORUn.293 | P | Un | 110581727 | 110582170 | - | Y |  |
| 339 | Gg2ORUn.294 | P | Un | 110991100 | 110991477 | - | Y |  |
| 340 | Gg2ORUn.295 | P | Un | 111140598 | 111141041 | + | Y |  |
| 341 | Gg2ORUn.296 | F | Un | 111241453 | 111242412 | - | Y |  |
| 342 | Gg2ORUn.297 | P | Un | 111244281 | 111244976 | + | Y |  |
| 343 | Gg2ORUn.298 | P | Un | 111825690 | 111825995 | + | Y |  |
| 344 | Gg2ORUn.299 | P | Un | 112293297 | 112293992 | - | Y |  |
| 345 | Gg2ORUn.300 | P | Un | 112351039 | 112351416 | + | Y |  |
| 346 | Gg2ORUn.301 | P | Un | 112369544 | 112369855 | + | Y |  |
| 347 | Gg2ORUn.302 | P | Un | 112522324 | 112522941 | - | Y |  |
| 348 | Gg2ORUn.303 | P | Un | 112816778 | 112817113 | - | Y |  |

|     |             |   |    |           |           |   |   |  |
|-----|-------------|---|----|-----------|-----------|---|---|--|
| 349 | Gg2ORUn.304 | P | Un | 114047445 | 114047627 | + | Y |  |
| 350 | Gg2ORUn.305 | P | Un | 114583649 | 114584497 | - | Y |  |
| 351 | Gg2ORUn.306 | P | Un | 114597023 | 114597445 | + | Y |  |
| 352 | Gg2ORUn.307 | P | Un | 114600590 | 114601165 | - | Y |  |
| 353 | Gg2ORUn.308 | P | Un | 114823146 | 114823622 | + | Y |  |
| 354 | Gg2ORUn.309 | P | Un | 115357826 | 115358383 | + | Y |  |
| 355 | Gg2ORUn.310 | P | Un | 115701730 | 115702365 | + | Y |  |
| 356 | Gg2ORUn.311 | P | Un | 115744152 | 115744457 | + | Y |  |
| 357 | Gg2ORUn.312 | P | Un | 116355718 | 116356398 | - | Y |  |
| 358 | Gg2ORUn.313 | P | Un | 116590513 | 116591061 | + | Y |  |
| 359 | Gg2ORUn.314 | P | Un | 116593792 | 116594481 | + | Y |  |
| 360 | Gg2ORUn.315 | P | Un | 116647981 | 116648574 | + | Y |  |
| 361 | Gg2ORUn.316 | P | Un | 117062282 | 117063171 | - | Y |  |
| 362 | Gg2ORUn.317 | P | Un | 117072300 | 117073151 | - | Y |  |
| 363 | Gg2ORUn.318 | P | Un | 117318864 | 117319367 | + | Y |  |
| 364 | Gg2ORUn.319 | P | Un | 117344904 | 117345602 | + | Y |  |
| 365 | Gg2ORUn.320 | P | Un | 117363806 | 117364696 | - | Y |  |
| 366 | Gg2ORUn.321 | P | Un | 117840936 | 117841181 | + | Y |  |
| 367 | Gg2ORUn.322 | P | Un | 118236436 | 118236999 | - | Y |  |
| 368 | Gg2ORUn.323 | P | Un | 118735014 | 118735904 | - | Y |  |
| 369 | Gg2ORUn.324 | P | Un | 118785358 | 118785777 | - | Y |  |
| 370 | Gg2ORUn.325 | P | Un | 118853243 | 118854229 | - | Y |  |
| 371 | Gg2ORUn.326 | P | Un | 119343186 | 119343686 | - | Y |  |
| 372 | Gg2ORUn.327 | F | Un | 119799919 | 119800878 | + | Y |  |
| 373 | Gg2ORUn.328 | P | Un | 119941064 | 119941558 | - | Y |  |
| 374 | Gg2ORUn.329 | P | Un | 120261280 | 120261798 | + | Y |  |
| 375 | Gg2ORUn.330 | P | Un | 120634459 | 120634698 | - | Y |  |
| 376 | Gg2ORUn.331 | P | Un | 121186883 | 121187350 | + | Y |  |
| 377 | Gg2ORUn.332 | P | Un | 121643338 | 121643973 | + | Y |  |
| 378 | Gg2ORUn.333 | P | Un | 121646275 | 121646685 | - | Y |  |
| 379 | Gg2ORUn.334 | P | Un | 121926194 | 121926748 | - | Y |  |
| 380 | Gg2ORUn.335 | P | Un | 122123185 | 122123700 | + | Y |  |
| 381 | Gg2ORUn.336 | P | Un | 122581945 | 122582622 | - | Y |  |
| 382 | Gg2ORUn.337 | P | Un | 122622865 | 122623761 | - | Y |  |
| 383 | Gg2ORUn.338 | P | Un | 122627492 | 122628091 | - | Y |  |
| 384 | Gg2ORUn.339 | P | Un | 123051829 | 123052356 | - | Y |  |
| 385 | Gg2ORUn.340 | P | Un | 123158523 | 123158999 | - | Y |  |
| 386 | Gg2ORUn.341 | P | Un | 123164465 | 123164863 | - | Y |  |
| 387 | Gg2ORUn.342 | P | Un | 123167774 | 123168283 | - | Y |  |
| 388 | Gg2ORUn.343 | F | Un | 123297313 | 123298272 | + | Y |  |
| 389 | Gg2ORUn.344 | P | Un | 123984699 | 123985256 | - | Y |  |
| 390 | Gg2ORUn.345 | P | Un | 123990591 | 123991034 | + | Y |  |
| 391 | Gg2ORUn.346 | P | Un | 124059421 | 124060029 | + | Y |  |
| 392 | Gg2ORUn.347 | P | Un | 124116255 | 124116935 | - | Y |  |
| 393 | Gg2ORUn.348 | P | Un | 124192655 | 124193383 | + | Y |  |
| 394 | Gg2ORUn.349 | F | Un | 124544690 | 124545649 | - | Y |  |
| 395 | Gg2ORUn.350 | P | Un | 124932973 | 124933440 | - | Y |  |
| 396 | Gg2ORUn.351 | P | Un | 125117405 | 125118067 | + | Y |  |
| 397 | Gg2ORUn.352 | P | Un | 125227607 | 125228347 | + | Y |  |
| 398 | Gg2ORUn.353 | P | Un | 125496383 | 125497123 | - | Y |  |
| 399 | Gg2ORUn.354 | P | Un | 125506120 | 125507030 | + | Y |  |
| 400 | Gg2ORUn.355 | P | Un | 125575717 | 125576187 | + | Y |  |
| 401 | Gg2ORUn.356 | P | Un | 125578566 | 125579162 | - | Y |  |
| 402 | Gg2ORUn.357 | P | Un | 125863403 | 125864134 | - | Y |  |
| 403 | Gg2ORUn.358 | F | Un | 126390375 | 126391358 | + | Y |  |
| 404 | Gg2ORUn.359 | P | Un | 126393304 | 126393783 | - | Y |  |
| 405 | Gg2ORUn.360 | P | Un | 126661645 | 126662412 | - | Y |  |
| 406 | Gg2ORUn.361 | P | Un | 126882663 | 126883184 | + | Y |  |

|     |             |   |    |           |           |   |   |  |
|-----|-------------|---|----|-----------|-----------|---|---|--|
| 407 | Gg2ORUn.362 | P | Un | 126884374 | 126884682 | + | Y |  |
| 408 | Gg2ORUn.363 | P | Un | 126917060 | 126917656 | - | Y |  |
| 409 | Gg2ORUn.364 | P | Un | 127253741 | 127254490 | + | Y |  |
| 410 | Gg2ORUn.365 | P | Un | 127285228 | 127285803 | - | Y |  |
| 411 | Gg2ORUn.366 | P | Un | 127352677 | 127353255 | - | Y |  |
| 412 | Gg2ORUn.367 | P | Un | 127572646 | 127573545 | - | Y |  |
| 413 | Gg2ORUn.368 | P | Un | 127845229 | 127845861 | - | Y |  |
| 414 | Gg2ORUn.369 | P | Un | 129237897 | 129238274 | + | Y |  |
| 415 | Gg2ORUn.370 | F | Un | 129265271 | 129266236 | - | Y |  |
| 416 | Gg2ORUn.371 | P | Un | 129840027 | 129840458 | + | Y |  |
| 417 | Gg2ORUn.372 | P | Un | 129840711 | 129840989 | + | Y |  |
| 418 | Gg2ORUn.373 | P | Un | 129924852 | 129925751 | - | Y |  |
| 419 | Gg2ORUn.374 | P | Un | 130116759 | 130117352 | - | Y |  |
| 420 | Gg2ORUn.375 | P | Un | 130888714 | 130889391 | + | Y |  |
| 421 | Gg2ORUn.376 | P | Un | 130910380 | 130910673 | - | Y |  |
| 422 | Gg2ORUn.377 | P | Un | 131825492 | 131826367 | - | Y |  |
| 423 | Gg2ORUn.378 | P | Un | 131943097 | 131943351 | - | Y |  |
| 424 | Gg2ORUn.379 | P | Un | 132184711 | 132185289 | - | Y |  |
| 425 | Gg2ORUn.380 | P | Un | 132241402 | 132241986 | + | Y |  |
| 426 | Gg2ORUn.381 | P | Un | 132694217 | 132695005 | - | Y |  |
| 427 | Gg2ORUn.382 | P | Un | 132738892 | 132739794 | + | Y |  |
| 428 | Gg2ORUn.383 | P | Un | 132742709 | 132743245 | + | Y |  |
| 429 | Gg2ORUn.384 | P | Un | 132944144 | 132944824 | + | Y |  |
| 430 | Gg2ORUn.385 | P | Un | 133246861 | 133247628 | - | Y |  |
| 431 | Gg2ORUn.386 | P | Un | 133452800 | 133453561 | - | Y |  |
| 432 | Gg2ORUn.387 | P | Un | 133513441 | 133514229 | - | Y |  |
| 433 | Gg2ORUn.388 | P | Un | 134417388 | 134417888 | + | Y |  |
| 434 | Gg2ORUn.389 | P | Un | 134421487 | 134421900 | - | Y |  |
| 435 | Gg2ORUn.390 | P | Un | 134486325 | 134486741 | - | Y |  |
| 436 | Gg2ORUn.391 | P | Un | 134597797 | 134598387 | + | Y |  |
| 437 | Gg2ORUn.392 | P | Un | 135447286 | 135447480 | - | Y |  |
| 438 | Gg2ORUn.393 | P | Un | 135632469 | 135632969 | + | Y |  |
| 439 | Gg2ORUn.394 | P | Un | 136803170 | 136803736 | - | Y |  |
| 440 | Gg2ORUn.395 | P | Un | 136810206 | 136810616 | + | Y |  |
| 441 | Gg2ORUn.396 | P | Un | 136893890 | 136894555 | + | Y |  |
| 442 | Gg2ORUn.397 | P | Un | 136982543 | 136983295 | - | Y |  |
| 443 | Gg2ORUn.398 | P | Un | 137627900 | 137628295 | - | Y |  |
| 444 | Gg2ORUn.399 | P | Un | 137739889 | 137740425 | + | Y |  |
| 445 | Gg2ORUn.400 | P | Un | 138876454 | 138877275 | + | Y |  |
| 446 | Gg2ORUn.401 | P | Un | 139275973 | 139276200 | + | Y |  |
| 447 | Gg2ORUn.402 | P | Un | 139512679 | 139513221 | + | Y |  |
| 448 | Gg2ORUn.403 | P | Un | 139573200 | 139573802 | + | Y |  |
| 449 | Gg2ORUn.404 | P | Un | 139576095 | 139576469 | - | Y |  |
| 450 | Gg2ORUn.405 | P | Un | 139725761 | 139726429 | + | Y |  |
| 451 | Gg2ORUn.406 | P | Un | 140045839 | 140046546 | + | Y |  |
| 452 | Gg2ORUn.407 | P | Un | 140235375 | 140236211 | - | Y |  |
| 453 | Gg2ORUn.408 | P | Un | 140373071 | 140373706 | - | Y |  |
| 454 | Gg2ORUn.409 | P | Un | 140514781 | 140515068 | + | Y |  |
| 455 | Gg2ORUn.410 | P | Un | 140662856 | 140663491 | + | Y |  |
| 456 | Gg2ORUn.411 | P | Un | 140844826 | 140845347 | + | Y |  |
| 457 | Gg2ORUn.412 | P | Un | 140859558 | 140859953 | - | Y |  |
| 458 | Gg2ORUn.413 | F | Un | 140884937 | 140885875 | - | Y |  |
| 459 | Gg2ORUn.414 | F | Un | 140891391 | 140892359 | - | Y |  |
| 460 | Gg2ORUn.415 | F | Un | 140904740 | 140905696 | - | Y |  |
| 461 | Gg2ORUn.416 | P | Un | 140944574 | 140945314 | + | Y |  |
| 462 | Gg2ORUn.417 | P | Un | 141066814 | 141067122 | + | Y |  |
| 463 | Gg2ORUn.418 | P | Un | 141277118 | 141277462 | + | Y |  |
| 464 | Gg2ORUn.419 | P | Un | 141532889 | 141533611 | - | Y |  |
| 465 | Gg2ORUn.420 | P | Un | 141818334 | 141819059 | - | Y |  |



|     |             |   |    |           |           |   |   |  |
|-----|-------------|---|----|-----------|-----------|---|---|--|
| 466 | Gg2ORUn.421 | P | Un | 142066304 | 142067047 | - | Y |  |
| 467 | Gg2ORUn.422 | P | Un | 142521671 | 142521901 | - | Y |  |
| 468 | Gg2ORUn.423 | P | Un | 142674387 | 142675055 | - | Y |  |
| 469 | Gg2ORUn.424 | P | Un | 142946303 | 142946851 | - | Y |  |
| 470 | Gg2ORUn.425 | P | Un | 143187291 | 143187986 | + | Y |  |
| 471 | Gg2ORUn.426 | P | Un | 143296456 | 143296758 | + | Y |  |
| 472 | Gg2ORUn.427 | P | Un | 143655098 | 143655760 | - | Y |  |
| 473 | Gg2ORUn.428 | P | Un | 144111698 | 144112165 | - | Y |  |
| 474 | Gg2ORUn.429 | P | Un | 144193446 | 144193685 | - | Y |  |
| 475 | Gg2ORUn.430 | F | Un | 144759338 | 144760306 | - | Y |  |
| 476 | Gg2ORUn.431 | P | Un | 144838625 | 144839368 | - | Y |  |
| 477 | Gg2ORUn.432 | P | Un | 145589177 | 145589797 | - | Y |  |
| 478 | Gg2ORUn.433 | F | Un | 145857987 | 145858940 | - | Y |  |
| 479 | Gg2ORUn.434 | P | Un | 145965231 | 145965740 | + | Y |  |
| 480 | Gg2ORUn.435 | P | Un | 146181840 | 146182067 | - | Y |  |
| 481 | Gg2ORUn.436 | P | Un | 146865274 | 146865780 | + | Y |  |
| 482 | Gg2ORUn.437 | P | Un | 147775061 | 147775396 | - | Y |  |
| 483 | Gg2ORUn.438 | P | Un | 147905222 | 147905830 | - | Y |  |
| 484 | Gg2ORUn.439 | P | Un | 148373663 | 148374028 | + | Y |  |
| 485 | Gg2ORUn.440 | P | Un | 148386781 | 148387248 | - | Y |  |
| 486 | Gg2ORUn.441 | P | Un | 148409198 | 148409926 | - | Y |  |
| 487 | Gg2ORUn.442 | P | Un | 148507239 | 148507541 | - | Y |  |
| 488 | Gg2ORUn.443 | P | Un | 149115503 | 149116267 | - | Y |  |
| 489 | Gg2ORUn.444 | F | Un | 149136716 | 149137666 | + | Y |  |
| 490 | Gg2ORUn.445 | P | Un | 149724263 | 149724982 | + | Y |  |
| 491 | Gg2ORUn.446 | P | Un | 149799498 | 149800031 | + | Y |  |
| 492 | Gg2ORUn.447 | P | Un | 149802441 | 149803031 | - | Y |  |
| 493 | Gg2ORUn.448 | P | Un | 150147425 | 150148309 | - | Y |  |
| 494 | Gg2ORUn.449 | P | Un | 150411171 | 150411371 | + | Y |  |
| 495 | Gg2ORUn.450 | P | Un | 150807353 | 150807817 | + | Y |  |
| 496 | Gg2ORUn.451 | P | Un | 150891563 | 150892186 | - | Y |  |
| 497 | Gg2ORUn.452 | P | Un | 151034872 | 151035549 | + | Y |  |
| 498 | Gg2ORUn.453 | P | Un | 151198789 | 151199427 | - | Y |  |
| 499 | Gg2ORUn.454 | P | Un | 151268065 | 151268304 | - | Y |  |
| 500 | Gg2ORUn.455 | P | Un | 151319252 | 151319491 | - | Y |  |
| 501 | Gg2ORUn.456 | P | Un | 151792133 | 151792495 | - | Y |  |
| 502 | Gg2ORUn.457 | P | Un | 151909874 | 151910572 | + | Y |  |
| 503 | Gg2ORUn.458 | P | Un | 152483702 | 152484145 | - | Y |  |
| 504 | Gg2ORUn.459 | P | Un | 152719150 | 152719916 | + | Y |  |
| 505 | Gg2ORUn.460 | P | Un | 152721937 | 152722815 | - | Y |  |
| 506 | Gg2ORUn.461 | P | Un | 153083472 | 153084252 | - | Y |  |
| 507 | Gg2ORUn.462 | P | Un | 153210677 | 153210979 | - | Y |  |
| 508 | Gg2ORUn.463 | P | Un | 153326998 | 153327648 | + | Y |  |
| 509 | Gg2ORUn.464 | P | Un | 153328112 | 153328449 | + | Y |  |
| 510 | Gg2ORUn.465 | P | Un | 153658826 | 153659662 | + | Y |  |
| 511 | Gg2ORUn.466 | P | Un | 154213754 | 154213981 | - | Y |  |
| 512 | Gg2ORUn.467 | P | Un | 154277167 | 154277844 | - | Y |  |
| 513 | Gg2ORUn.468 | F | Un | 154412538 | 154413527 | + | Y |  |
| 514 | Gg2ORUn.469 | P | Un | 154542020 | 154542643 | - | Y |  |
| 515 | Gg2ORUn.470 | P | Un | 154587029 | 154587619 | + | Y |  |
| 516 | Gg2ORUn.471 | P | Un | 154919940 | 154920407 | - | Y |  |
| 517 | Gg2ORUn.472 | P | Un | 155114059 | 155114493 | - | Y |  |
| 518 | Gg2ORUn.473 | P | Un | 155354093 | 155354317 | + | Y |  |
| 519 | Gg2ORUn.474 | P | Un | 155440251 | 155440646 | + | α |  |
| 520 | Gg2ORUn.475 | P | Un | 155787150 | 155787323 | - | Y |  |
| 521 | Gg2ORUn.476 | P | Un | 156094285 | 156094851 | - | Y |  |
| 522 | Gg2ORUn.477 | P | Un | 156831368 | 156831895 | + | Y |  |
| 523 | Gg2ORUn.478 | P | Un | 157505936 | 157506346 | - | Y |  |

|     |             |   |     |           |           |   |   |  |
|-----|-------------|---|-----|-----------|-----------|---|---|--|
| 524 | Gg2ORUn.479 | P | Un  | 157516271 | 157516681 | - | Y |  |
| 525 | Gg2ORUn.480 | F | Un  | 157521348 | 157522319 | - | Y |  |
| 526 | Gg2ORUn.481 | P | Un  | 157531080 | 157531727 | + | Y |  |
| 527 | Gg2ORUn.482 | P | Un  | 157535479 | 157536291 | - | Y |  |
| 528 | Gg2ORUn.483 | F | Un  | 157573942 | 157574910 | + | Y |  |
| 529 | Gg2ORUn.484 | P | Un  | 158695019 | 158695486 | + | Y |  |
| 530 | Gg2ORUn.485 | P | Un  | 158898039 | 158898248 | + | Y |  |
| 531 | Gg2ORUn.486 | P | Un  | 158929697 | 158930164 | + | Y |  |
| 532 | Gg2ORUn.487 | P | Un  | 159407672 | 159408007 | + | Y |  |
| 533 | Gg2ORUn.488 | P | Un  | 159956517 | 159957137 | + | Y |  |
| 534 | Gg2ORUn.489 | P | Un  | 159961034 | 159961684 | - | Y |  |
| 535 | Gg2ORUn.490 | P | Un  | 159966556 | 159967023 | - | Y |  |
| 536 | Gg2ORUn.491 | P | Un  | 159974015 | 159974482 | + | Y |  |
| 537 | Gg2ORUn.492 | P | Un  | 160063962 | 160064480 | - | Y |  |
| 538 | Gg2ORUn.493 | P | Un  | 160310169 | 160310723 | - | Y |  |
| 539 | Gg2ORUn.494 | P | Un  | 160801517 | 160801960 | + | Y |  |
| 540 | Gg2ORUn.495 | P | Un  | 161787113 | 161787793 | + | Y |  |
| 541 | Gg2ORUn.496 | P | Un  | 162131932 | 162132495 | + | Y |  |
| 542 | Gg2ORUn.497 | P | Un  | 162326630 | 162327139 | - | Y |  |
| 543 | Gg2ORUn.498 | P | Un  | 162434877 | 162435128 | + | Y |  |
| 544 | Gg2ORUn.499 | P | Un  | 162447147 | 162447428 | - | Y |  |
| 545 | Gg2ORUn.500 | P | Un  | 162821383 | 162821913 | - | Y |  |
| 546 | Gg2ORUn.501 | P | Un  | 163383063 | 163383851 | + | Y |  |
| 547 | Gg2ORUn.502 | P | Un  | 164110045 | 164110740 | + | Y |  |
| 548 | Gg2ORUn.503 | P | Un  | 164398875 | 164399666 | + | Y |  |
| 549 | Gg2ORUn.504 | P | Un  | 164773874 | 164774113 | - | Y |  |
| 550 | Gg2ORUn.505 | P | Un  | 164917583 | 164918302 | + | Y |  |
| 551 | Gg2OR10R.1  | F | 10R | 2368      | 3351      | - | Y |  |
| 552 | Gg2OR10R.2  | P | 10R | 5126      | 5416      | - | Y |  |
| 553 | Gg2OR10R.3  | P | 10R | 11215     | 11979     | + | Y |  |
| 554 | Gg2OR10R.4  | P | 10R | 25160     | 26128     | - | Y |  |
| 555 | Z79585-1    | F |     |           |           |   | Y |  |
| 556 | Z79587-1    | F |     |           |           |   | Y |  |
| 557 | Z79588-1    | F |     |           |           |   | Y |  |
| 558 | Z79589-1    | F |     |           |           |   | Y |  |

\* F, a functional gene; P, a pseudogene or a partial sequence.
