# Supplementary material
Source: PubMed Central journal article supplement (PMC1087945)

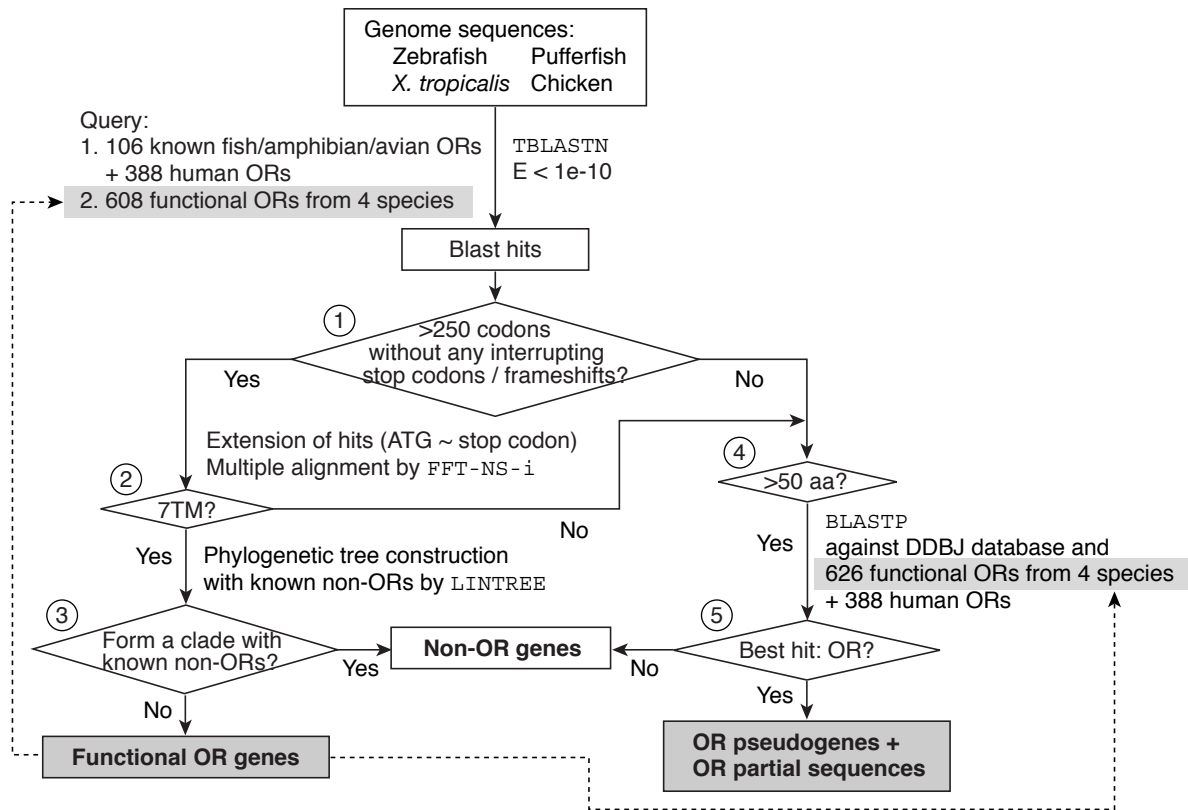

Supplement: pnas_102_17_6039__1.pdf [file pnas_102_17_6039__1.pdf]

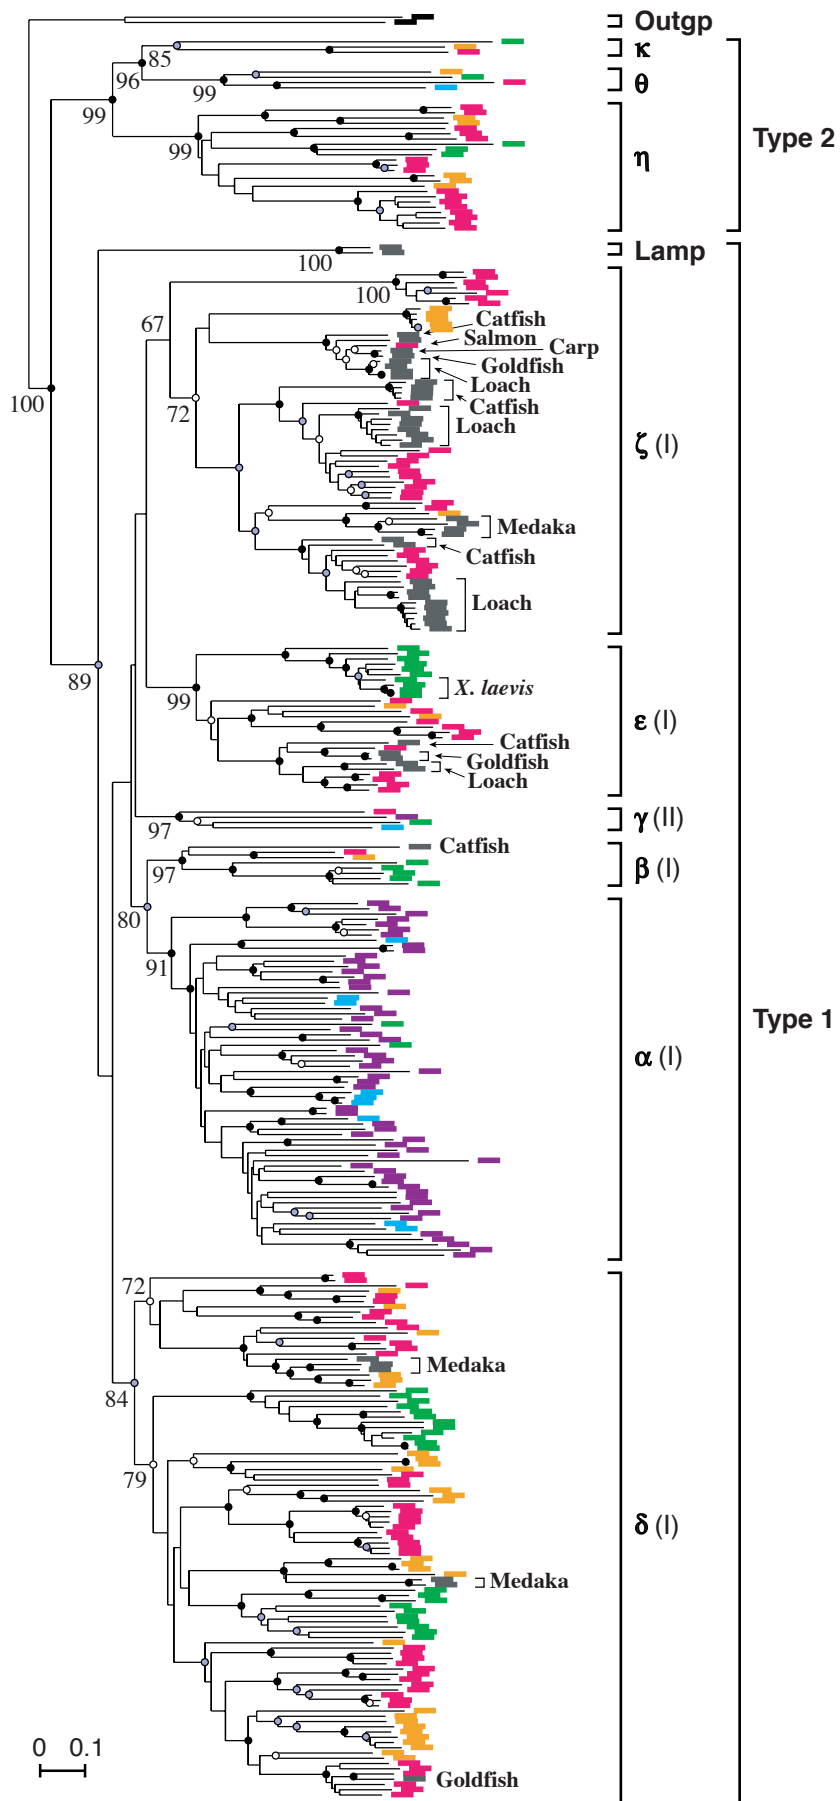

Supplement: pnas_102_17_6039__14.pdf [file pnas_102_17_6039__14.pdf]
